# Supplementary material for: Paradoxical Changes Underscore Epigenetic Reprogramming During Adult Zebrafish Extraocular Muscle Regeneration
Source: PubMed Central journal article supplement — Invest Ophthalmol Vis Sci. 2019 Dec;60(15):4991–9. doi: 10.1167/iovs.19-27556 (PMC6890397; doi:10.1167/iovs.19-27556), 2019-12
Supplement: iovs-60-14-20_s04.pdf [file iovs-60-14-20_s04.pdf]

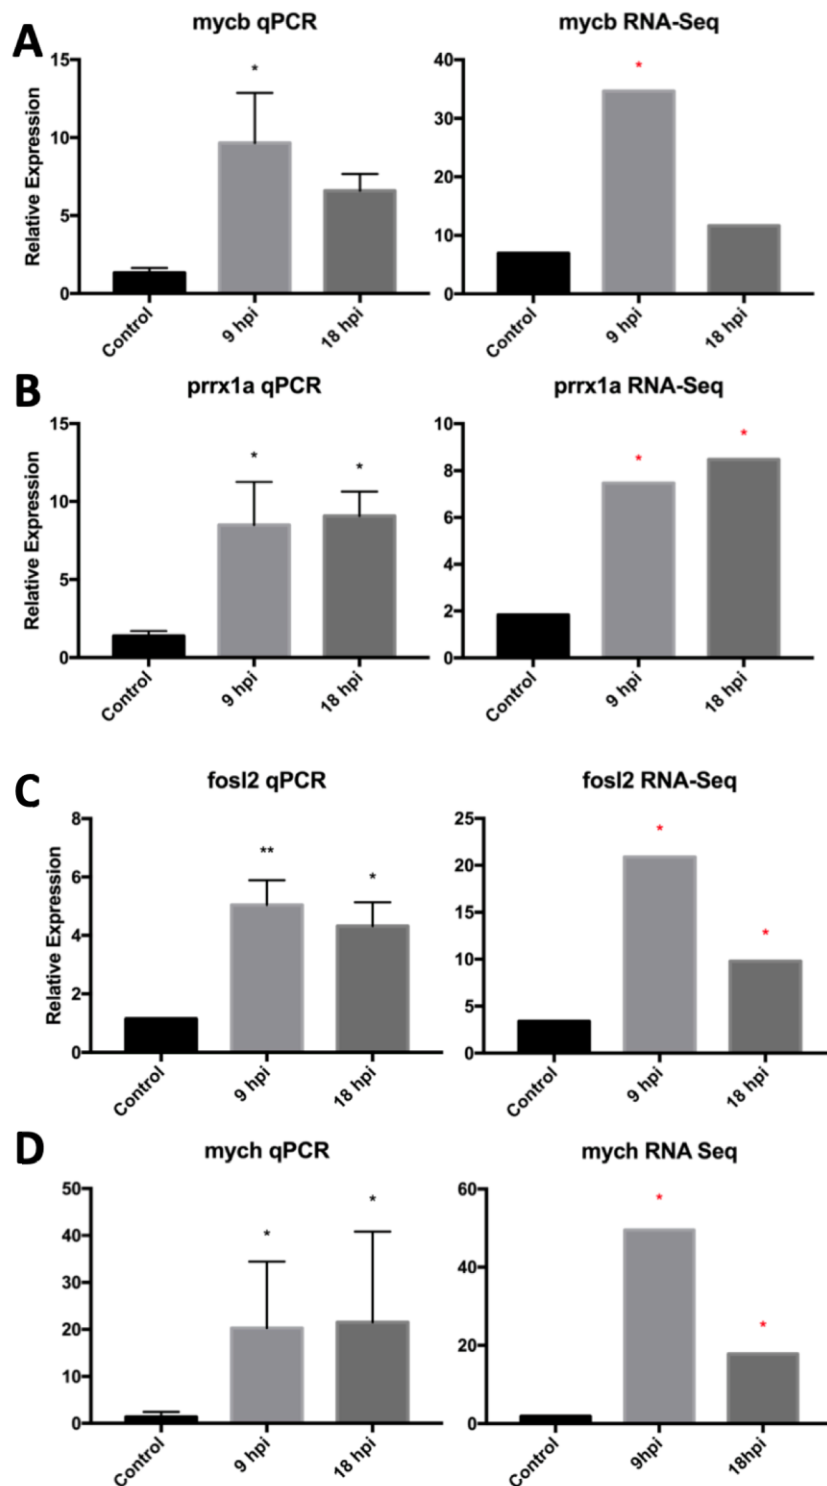

**Figure S1.** Comparisons of qPCR of surgically removed tissue to RNA-seq analysis of laser microdissected tissue shows no significant difference in gene expression between the two methods. Black astrices indicate ANOVA significance tests done with qPCR data, red astrices indicate genes found to be significantly differentially expressed based on CuffDiff as determined in Louie et al. (2017) (\* $P < 0.05$ , \*\*  $P < 0.01$ , as compared to control).
