# Supplementary material for: Paradoxical Changes Underscore Epigenetic Reprogramming During Adult Zebrafish Extraocular Muscle Regeneration
Source: PubMed Central journal article supplement — Invest Ophthalmol Vis Sci. 2019 Dec;60(15):4991–9. doi: 10.1167/iovs.19-27556 (PMC6890397; doi:10.1167/iovs.19-27556), 2019-12
Supplement: iovs-60-14-20_s05.pdf [file iovs-60-14-20_s05.pdf]

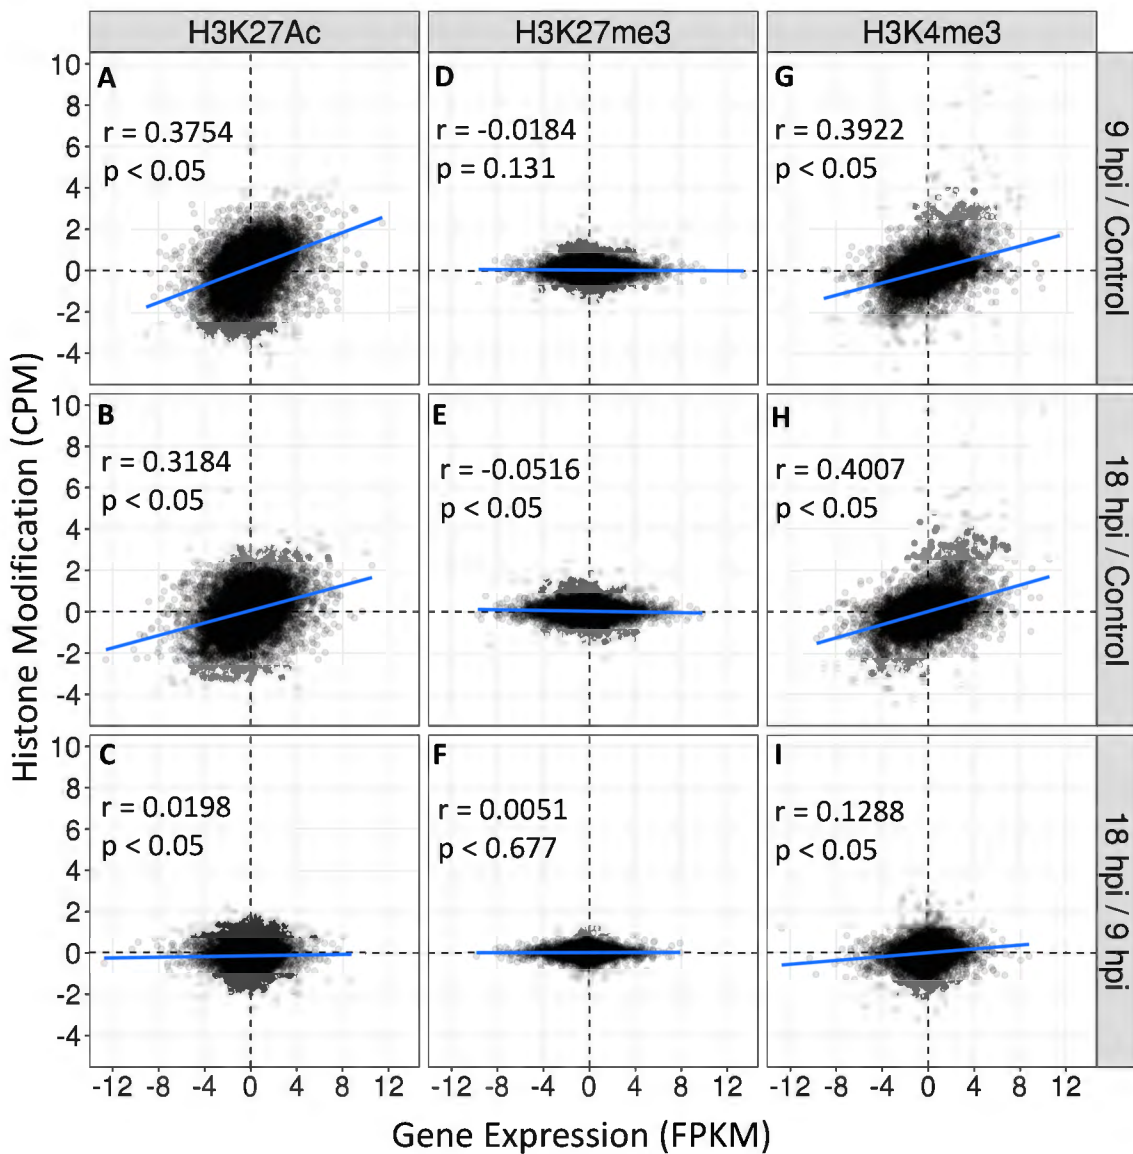

Figure S2. Post-injury gene expression changes correlate with histone modification levels for H3K27Ac and H3K4me3 - but not H3K27me3 – for all genes when compared to Control. (A-I) These scatterplots show all genes with associated active regions for each histone modification. Changes for both genes and histone modifications are in log<sub>2</sub> fold-change (LFC). Correlation is represented by Pearson's r and p-values are from correlation tests (0.05 significance level). Blue lines represent linear regressions.
