# Supplementary material for: Paradoxical Changes Underscore Epigenetic Reprogramming During Adult Zebrafish Extraocular Muscle Regeneration
Source: PubMed Central journal article supplement — Invest Ophthalmol Vis Sci. 2019 Dec;60(15):4991–9. doi: 10.1167/iovs.19-27556 (PMC6890397; doi:10.1167/iovs.19-27556), 2019-12
Supplement: iovs-60-14-20_s06.pdf [file iovs-60-14-20_s06.pdf]

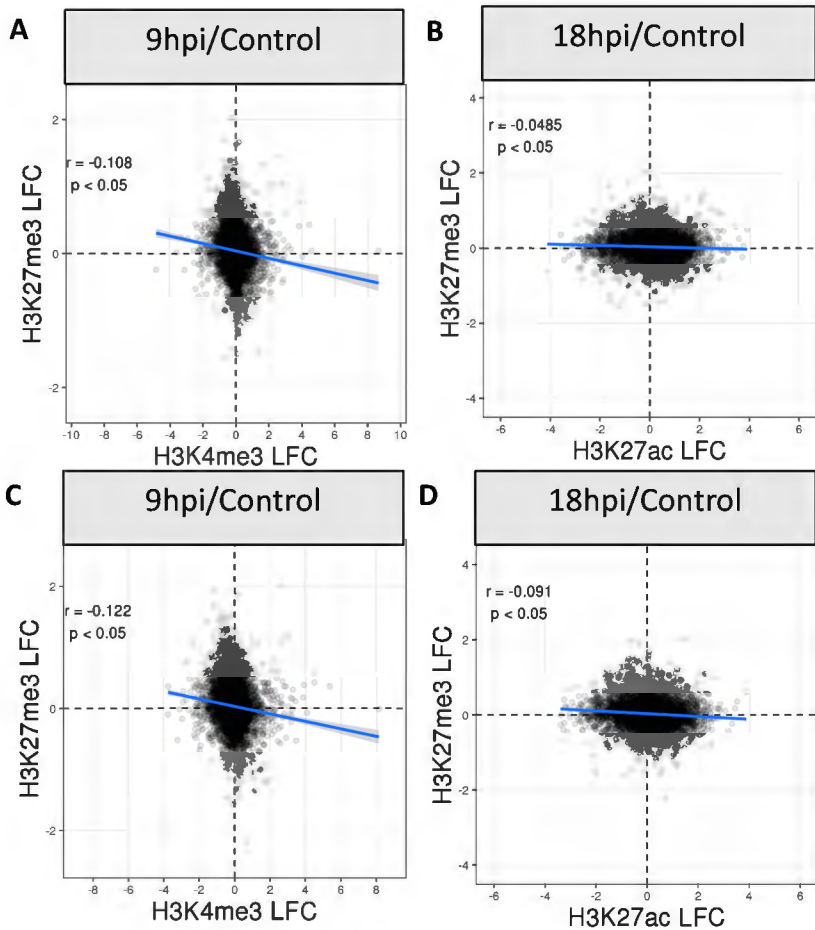

Figure S3. Comparison of changes among H3K27me3 and H3K27Ac/H3K4me3 between time points. Log2 fold-changes (LFC) were compared among histone modifications for all genes in the Control to 9 hpi (**A, C**) and Control to 18 hpi (**B, D**) periods.
