# Supplementary material for: Paradoxical Changes Underscore Epigenetic Reprogramming During Adult Zebrafish Extraocular Muscle Regeneration
Source: PubMed Central journal article supplement — Invest Ophthalmol Vis Sci. 2019 Dec;60(15):4991–9. doi: 10.1167/iovs.19-27556 (PMC6890397; doi:10.1167/iovs.19-27556), 2019-12
Supplement: iovs-60-14-20_s07.pdf [file iovs-60-14-20_s07.pdf]

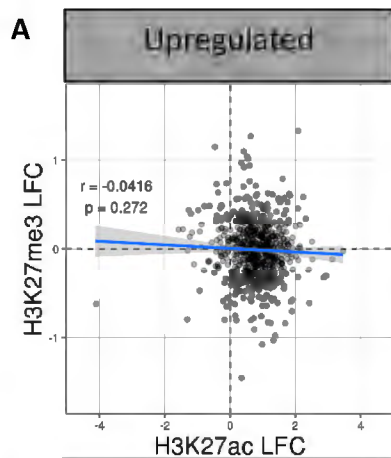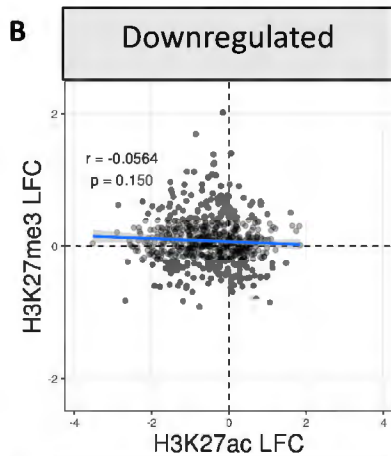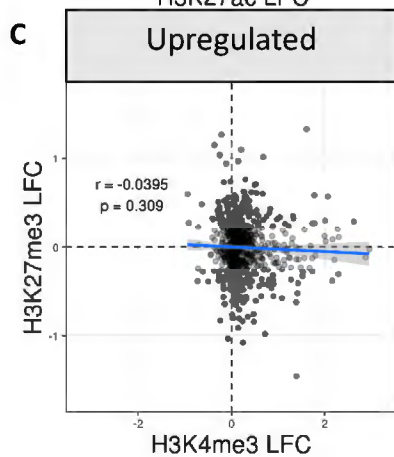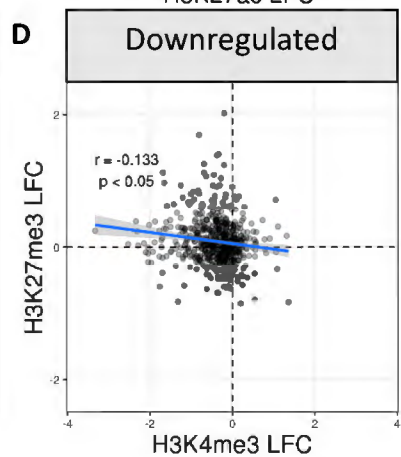

Figure S4. Comparison of changes for H3K27me3 and H3K27Ac/H3K4me3 in upregulated or downregulated DEGs. Log2 fold-changes (LFC) were compared among histone modifications for upregulated DEGs (A, C) and downregulated DEGs (B, D).
